# Supplementary material
Source: PubMed Central journal article supplement (PMC6422091)
Supplement: supp_RA118.005844_140759_3_supp_266560_pl5sk9.pdf [file supp_RA118.005844_140759_3_supp_266560_pl5sk9.pdf]

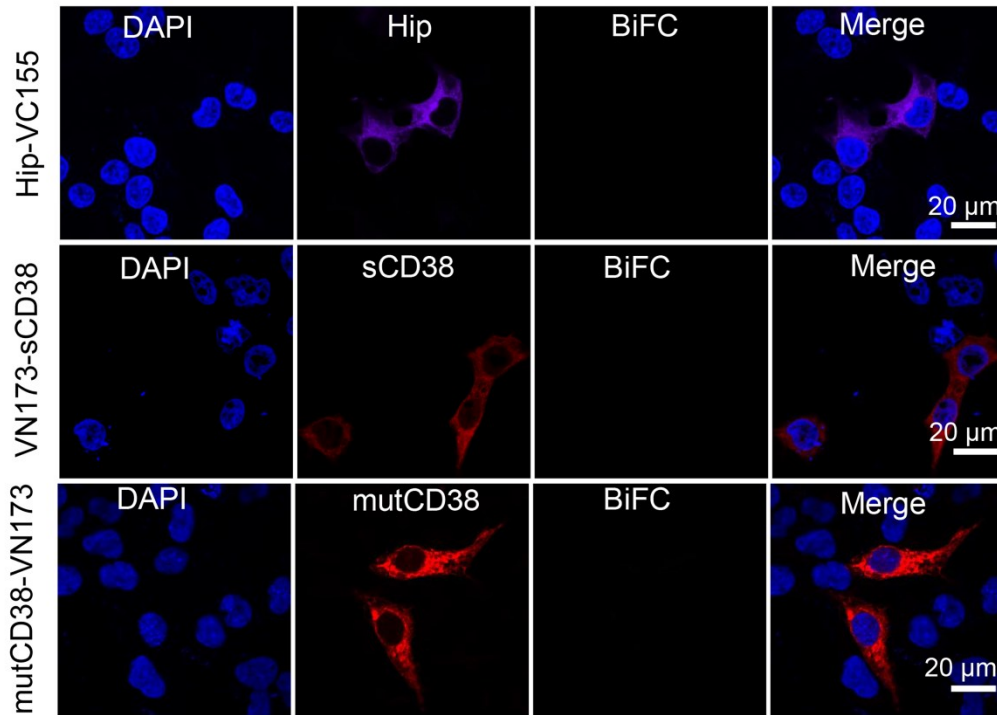

**Suppl Figure 1. single-fusion controls of BiFC assay shown in Fig. 1c.** The expression vectors for Hip-VC155 (upper panel), VN173-sCD38 (middle panel) or mutCD38-VN173 (lower panel) was transfected to HEK-293T. The expression of the fusion proteins and BiFC signals were analyzed as Fig. 1c. BiFC signal, yellow; immunostaining of CD38, red; Hip, far red; nuclear staining (DAPI), blue. The merged image showed superposition of BiFC, CD38, Hip, and DAPI signals. Scale bar: 20  $\mu\text{m}$ .

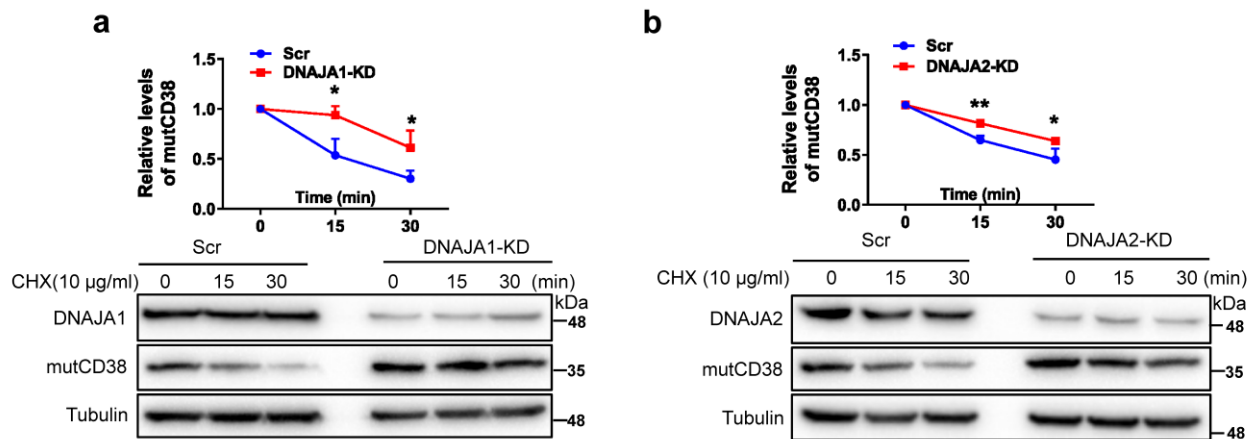

**Suppl Figure 2.** Chase experiments were performed as Fig. 4d except that the siRNAs are specific to DNAJA1 (a) or DNAJA2 (b).
